# Supplementary material for: Bleeding and thromboembolism due to drug-drug interactions with non-vitamin K antagonist oral anticoagulants—a Swedish, register-based cohort study in atrial fibrillation outpatients
Source: PubMed Central journal article supplement (PMC7867544; doi:10.1007/s00228-020-03015-7), 2020-10-07
Supplement: 228_2020_3015_MOESM1_ESM.pdf [file 228_2020_3015_MOESM1_ESM.pdf]

## Supplementary material

**Supplementary table 1.** Definitions of medical conditions by ICD-10 codes and procedure codes, for descriptive purposes, covariates and outcomes.

| Variable                                                | ICD-diagnoses and procedure codes                                                                                                                                                              | Category <sup>b</sup> |
|---------------------------------------------------------|------------------------------------------------------------------------------------------------------------------------------------------------------------------------------------------------|-----------------------|
| Atrial fibrillation                                     | I48                                                                                                                                                                                            | 1                     |
| Mechanical valve                                        | Z952, FCA60, FDC10, FGE00, FGE96, FJF00, FJF96, FKD00, FKD96, FMD00, FMD96                                                                                                                     | 1                     |
| Mitral stenosis                                         | I050, I342, I052, Q232                                                                                                                                                                         | 1                     |
| Heart failure                                           | I110, I130, I132, I50                                                                                                                                                                          | 1                     |
| Hypertension                                            | I10, I11, I12, I13, I15, O10                                                                                                                                                                   | 1                     |
| Diabetes                                                | E10, E11, E12, E13, E14, G590, G632, H280, H360, M142, N083                                                                                                                                    | 1                     |
| TIA/RIND                                                | G45, Z866A <sup>a</sup> , Z866B <sup>a</sup>                                                                                                                                                   | 1                     |
| Stroke unspecified                                      | I64, I694 <sup>a</sup> , Z867C <sup>a</sup>                                                                                                                                                    | 1                     |
| Ischemic stroke                                         | I63, I693 <sup>a</sup>                                                                                                                                                                         | 1                     |
| Arterial embolism and thrombosis                        | I74                                                                                                                                                                                            | 1                     |
| Vascular disease                                        | I20, I21, I22, I23, I24, I25, I67, I70, I71, I72, I73, M311, K550, K551, K559                                                                                                                  | 1                     |
| Cancer                                                  | C                                                                                                                                                                                              | 2                     |
| Dementia                                                | F00, F01, F02, F03, F051, F107A, G30, G318A                                                                                                                                                    | 1                     |
| Alcohol abuse                                           | E244, F10, G312, G621, G721, I426, K292, K70, K852, K860, O354, T510, T519, Y90, Y91, Z502, Z714, Z721                                                                                         | 3                     |
| Anemia                                                  | D46, D50, D51, D52, D53, D55, D56, D57, D58, D59, D60, D61, D62, D63, D64, O990                                                                                                                | 3                     |
| Venous thrombosis                                       | I26, I80, I81, I82, K645, O223, O871, Z867A <sup>a</sup> , Z867B <sup>a</sup>                                                                                                                  | 1                     |
| DVT/PE                                                  | I26, I80, O223, O871                                                                                                                                                                           | 4                     |
| Hip or knee replacement                                 | NFB, NFC, NGB, NGC                                                                                                                                                                             | 4                     |
| Renal disease                                           | N18, N19, Y841, Z992, N17                                                                                                                                                                      | 1, N17: 3             |
| Liver disease                                           | B150, B160, B162, B180E, B180G, B181E, B181G, B182E, B182G, B188E, B188G, B189E, B189G, B190, K70, K71, K72, K73, K74, K75, K76, K77                                                           | 1                     |
| Obesity                                                 | E65, E66                                                                                                                                                                                       | 3                     |
| COPD/emphysema                                          | J43, J44, J982, J983                                                                                                                                                                           | 1                     |
| Gastrointestinal bleeding                               | I850, I983, K226, K250, K251, K252, K254, K255, K256, K260, K261, K262, K264, K265, K266, K270, K271, K272, K274, K275, K276, K280, K281, K282, K284, K285, K286, K290, K625, K920, K921, K922 | 2                     |
| Hemorrhagic stroke                                      | I61                                                                                                                                                                                            | 2                     |
| Other intracranial bleeding                             | I60, I62, S064, S065, S066                                                                                                                                                                     | 2                     |
| Other severe bleeding                                   | D500, D62, D683, D698, D699, H313, H356, H431, I312, J942, K661, N501A, N93, N950, O20, R041, R042, R048, R049, R58, T810                                                                      | 2                     |
| Fall                                                    | R296, W00, W01, W02, W03, W04, W05, W06, W07, W08, W09, W10, W11, W12, W13, W14, W15, W17, W18, W19                                                                                            | 3                     |
| Ischemic stroke/TIA/arterial embolus/stroke unspecified | I63, I693 <sup>a</sup> , G45, Z866A <sup>a</sup> , Z866B <sup>a</sup> , I74, I64, I694 <sup>a</sup> , Z867C <sup>a</sup>                                                                       | 1                     |
| Ischemic stroke/stroke unspecified/TIA                  | I63, I693 <sup>a</sup> , G45, Z866A <sup>a</sup> , Z866B <sup>a</sup> , I64, I694 <sup>a</sup> , Z867C <sup>a</sup>                                                                            | 1                     |

|                       |                                                                                                                                                                                                                                                                                                                                                            |   |
|-----------------------|------------------------------------------------------------------------------------------------------------------------------------------------------------------------------------------------------------------------------------------------------------------------------------------------------------------------------------------------------------|---|
| Any severe bleed      | I850, I983, K226, K250, K251, K252, K254, K255, K256, K260, K261, K262, K264, K265, K266, K270, K271, K272, K274, K275, K276, K280, K281, K282, K284, K285, K286, K290, K625, K920, K921, K922, I61, I60, I62, S064, S065, S066, D500, D62, D683, D698, D699, H313, H356, H431, I312, J942, K661, N501A, N93, N950, O20, R041, R042, R048, R049, R58, T810 | 2 |
| Intracranial bleeding | I61, I60, I62, S064, S065, S066                                                                                                                                                                                                                                                                                                                            | 2 |

<sup>a</sup> Diagnoses that indicate historical event, used for covariates and descriptive variables, but not for outcomes.

<sup>b</sup> Categories 1-3 indicate the time period before index date for which an occurrence of the diagnosis was considered relevant for covariates and descriptive variables. 1 = 10 years, 2 = 5 years, 3 = 6 months. Category 4 was considered within 60 days before index date as exclusion criteria.

**Supplementary table 2.** Definitions of drug treatment by ATC-codes.

| Substance            | ATC-codes                                                                                                                                                                 |
|----------------------|---------------------------------------------------------------------------------------------------------------------------------------------------------------------------|
| abiraterone          | L02BX03                                                                                                                                                                   |
| aceclofenac          | M01AB16                                                                                                                                                                   |
| acemetacin           | M01AB11                                                                                                                                                                   |
| acenocoumarol        | B01AA07                                                                                                                                                                   |
| acetylsalicylic acid | B01AC06, B01AC56, C07FX02, C07FX03, C07FX04, C10BX01, C10BX02, C10BX04, C10BX05, C10BX06, C10BX08, C10BX12, M01BA03, N02AJ02, N02AJ07, N02AJ18, N02BA01, N02BA51, N02BA71 |
| amiodarone           | C01BD01                                                                                                                                                                   |
| amprenavir           | J05AE05                                                                                                                                                                   |
| apalutamide          | L02BB05                                                                                                                                                                   |
| apixaban             | B01AF02                                                                                                                                                                   |
| argatroban           | B01AE03                                                                                                                                                                   |
| atazanavir           | J05AE08, J05AR15, J05AR23                                                                                                                                                 |
| benzylamine          | M01AX07                                                                                                                                                                   |
| bicalutamide         | L02AE51, L02BB03                                                                                                                                                          |
| bivalirudin          | B01AE06                                                                                                                                                                   |
| boceprevir           | J05AE12, J05AP03                                                                                                                                                          |
| caplacizumab         | B01AX07                                                                                                                                                                   |
| carbamazepine        | N03AF01                                                                                                                                                                   |
| cariprazine          | N05AX15                                                                                                                                                                   |
| celecoxib            | L01XX33, M01AH01                                                                                                                                                          |
| ciclosporin          | L04AA01, L04AD01                                                                                                                                                          |
| cilostazol           | B01AC23                                                                                                                                                                   |
| citalopram           | N06AB04                                                                                                                                                                   |
| clarithromycin       | A02BD04, A02BD05, A02BD06, A02BD07, A02BD09, A02BD11, J01FA09                                                                                                             |
| clomipramine         | N06AA04                                                                                                                                                                   |
| clopidogrel          | B01AC04                                                                                                                                                                   |
| cobicistat           | J05AR09, J05AR14, J05AR15, J05AR18, J05AR22, V03AX03                                                                                                                      |
| crizotinib           | L01XE16                                                                                                                                                                   |
| dabigatran           | B01AE07                                                                                                                                                                   |
| dalteparin           | B01AB04                                                                                                                                                                   |
| danaparoid           | B01AB09                                                                                                                                                                   |
| darunavir            | J05AE10, J05AR14, J05AR22                                                                                                                                                 |
| defibrotide          | B01AX01                                                                                                                                                                   |
| desirudin            | B01AE01                                                                                                                                                                   |
| dexamethasone        | H02AB02                                                                                                                                                                   |
| dexibuprofen         | M01AE14                                                                                                                                                                   |
| dexketoprofen        | M01AE17, N02AJ14                                                                                                                                                          |
| diclofenac           | M01AB05, M01AB55                                                                                                                                                          |
| diflunisal           | N02BA11                                                                                                                                                                   |
| diltiazem            | C08DB01                                                                                                                                                                   |
| dipyridamole         | B01AC07                                                                                                                                                                   |
| doxorubicin          | L01DB01                                                                                                                                                                   |

|                       |                                             |
|-----------------------|---------------------------------------------|
| dronedarone           | C01BD07                                     |
| duloxetine            | N06AX21                                     |
| edoxaban              | B01AF03                                     |
| efavirenz             | J05AG03, J05AR06, J05AR11                   |
| enoxaparin            | B01AB05                                     |
| enzalutamide          | L02BB04                                     |
| epoprostenol          | B01AC09                                     |
| erythromycin          | J01FA01, S01AA17                            |
| escitalopram          | N06AB10                                     |
| etodolac              | M01AB08                                     |
| etoricoxib            | M01AH05                                     |
| fluconazole           | J01RA07, J02AC01                            |
| fluoxetine            | N06AB03, N06CA03                            |
| flurbiprofen          | M01AE09                                     |
| fluvoxamine           | N06AB08                                     |
| fondaparinux          | B01AX05                                     |
| fosamprenavir         | J05AE07                                     |
| glecaprevir           | J05AP57                                     |
| heparin               | B01AB01, B01AB51                            |
| ibrutinib             | L01XE27                                     |
| ibuprofen             | C01EB16, M01AE01, M01AE51, N02AJ08, N02AJ19 |
| idelalisib            | L01XX47                                     |
| iloprost              | B01AC11                                     |
| imatinib              | L01XE01, L01XX28                            |
| indinavir             | J05AE02                                     |
| indobufen             | B01AC10                                     |
| indometacin           | C01EB03, M01AB01, M01AB51                   |
| inotuzumab ozogamicin | L01XC26                                     |
| ipilimumab            | L01XC11                                     |
| itraconazole          | J02AC02                                     |
| kebuzone              | M01AA06                                     |
| ketoconazole          | G01AF11, J02AB02                            |
| ketoprofen            | M01AE03, M01AE53                            |
| ketorolac             | M01AB15                                     |
| lapatinib             | L01XE07                                     |
| lepirudin             | B01AE02                                     |
| letermovir            | J05AX18                                     |
| levetiracetam         | N03AX14                                     |
| lopinavir             | J05AE06, J05AR10                            |
| lornoxicam            | M01AC05                                     |
| lumacaftor            | R07AX30                                     |
| lumiracoxib           | M01AH06                                     |
| meclofenamic acid     | M01AG04                                     |
| mefenamic acid        | M01AG01                                     |
| meloxicam             | M01AC06, M01AC56                            |

|                      |                                                                        |
|----------------------|------------------------------------------------------------------------|
| miconazole           | A07AC01, G01AF04, J02AB01, S02AA13                                     |
| milnacipran          | N06AX17                                                                |
| mitotane             | L01XX23                                                                |
| nabumetone           | M01AX01                                                                |
| nadroparin           | B01AB06                                                                |
| naproxen             | M01AE02, M01AE52, M01AE56                                              |
| nelfinavir           | J05AE04                                                                |
| neratinib            | L01XE45                                                                |
| niflumic acid        | M01AX02                                                                |
| nilotinib            | L01XE08                                                                |
| nimesulide           | M01AX17                                                                |
| oxcarbazepine        | N03AF02                                                                |
| paclitaxel           | L01CD01, L01CD03                                                       |
| parecoxib            | M01AH04                                                                |
| paroxetine           | N06AB05                                                                |
| pentosan polysulfate | G04BX15                                                                |
| phenobarbital        | N03AA02                                                                |
| phenprocoumon        | B01AA04                                                                |
| phenylbutazone       | M01AA01, M01BA01                                                       |
| phenytoin            | N03AB02, N03AB52                                                       |
| pibrentasvir         | J05AP57                                                                |
| piroxicam            | M01AC01, S01BC06                                                       |
| posaconazole         | J02AC04                                                                |
| prasugrel            | B01AC22                                                                |
| prednisone           | H02AB07                                                                |
| primidone            | N03AA03                                                                |
| proglumetacin        | M01AB14                                                                |
| propafenone          | C01BC03                                                                |
| quinidine            | C01BA01, C01BA51, C01BA71                                              |
| ramucirumab          | L01XC21                                                                |
| reviparin            | B01AB08                                                                |
| rifampicin           | J04AB02, J04AM02, J04AM05, J04AM06, J04AM07                            |
| rifamycin            | J04AB03, S01AA16, S02AA12                                              |
| ritonavir            | J05AE03, J05AE06, J05AP52, J05AP53, J05AR10, J05AR23, J05AX66, J05AX67 |
| rivaroxaban          | B01AF01, B01AX06                                                       |
| rofecoxib            | M01AH02                                                                |
| rolapitant           | A04AD14                                                                |
| saquinavir           | J05AE01                                                                |
| sarilumab            | L04AC14                                                                |
| sertraline           | N06AB06                                                                |
| siltuximab           | L04AC11                                                                |
| sulindac             | M01AB02                                                                |
| sunitinib            | L01XE04                                                                |
| tacrolimus           | L04AA05, L04AD02                                                       |
| tamoxifen            | L02BA01                                                                |

|                  |                                             |
|------------------|---------------------------------------------|
| telaprevir       | J05AE11, J05AP02                            |
| telithromycin    | J01FA15                                     |
| tenoxicam        | M01AC02                                     |
| tiaprofenic acid | M01AE11                                     |
| ticagrelor       | B01AC24                                     |
| ticlopidine      | B01AC05                                     |
| tinzaparin       | B01AB10                                     |
| tipranavir       | J05AE09                                     |
| tocilizumab      | L04AC07                                     |
| tolfenamic acid  | M01AG02                                     |
| topiramate       | N03AX11                                     |
| tramadol         | N02AJ13, N02AJ14, N02AJ15, N02AX02, N02AX52 |
| treprostinil     | B01AC21                                     |
| troleandomycin   | J01FA08                                     |
| valdecoxib       | M01AH03                                     |
| valproic acid    | N03AG01                                     |
| vandetanib       | L01XE12                                     |
| warfarin         | B01AA03                                     |
| velpatasvir      | J05AP55, J05AP56, J05AX69                   |
| venetoclax       | L01XX52                                     |
| venlafaxine      | N06AX16                                     |
| verapamil        | C08DA01, C08DA51, C09BB10                   |
| vinblastine      | L01CA01                                     |
| vorapaxar        | B01AC26                                     |
| voriconazole     | J02AC03                                     |
| voxilaprevir     | J05AP56                                     |

**Supplementary table 3.** Substances included in interacting drug groups per NOAC. Included substances based on documented clinically relevant interactions in the Janusmed Interaction Database or by EHRA [ref].

| Substance            | Apixaban               | Dabigatran             | Edoxaban               | Rivaroxaban            |
|----------------------|------------------------|------------------------|------------------------|------------------------|
| abiraterone          | CYP3A4/P-gp inhibitor  | CYP3A4/P-gp inhibitor  | CYP3A4/P-gp inhibitor  | CYP3A4/P-gp inhibitor  |
| aceclofenac          | Pharmacodynamic effect | Pharmacodynamic effect | Pharmacodynamic effect | Pharmacodynamic effect |
| acemetacin           | Pharmacodynamic effect | Pharmacodynamic effect | Pharmacodynamic effect | Pharmacodynamic effect |
| acenocoumarol        | Pharmacodynamic effect | Pharmacodynamic effect | Pharmacodynamic effect | Pharmacodynamic effect |
| acetylsalicylic acid | Pharmacodynamic effect | Pharmacodynamic effect | Pharmacodynamic effect | Pharmacodynamic effect |
| amiodarone           | CYP3A4/P-gp inhibitor  | CYP3A4/P-gp inhibitor  | CYP3A4/P-gp inhibitor  | CYP3A4/P-gp inhibitor  |
| amprenavir           | CYP3A4/P-gp inhibitor  | CYP3A4/P-gp inhibitor  | CYP3A4/P-gp inhibitor  | CYP3A4/P-gp inhibitor  |
| apalutamide          | NA                     | CYP3A4/P-gp inducer    | NA                     | NA                     |
| apixaban             | NA                     | Pharmacodynamic effect | Pharmacodynamic effect | Pharmacodynamic effect |
| argatroban           | Pharmacodynamic effect | Pharmacodynamic effect | Pharmacodynamic effect | Pharmacodynamic effect |
| atazanavir           | CYP3A4/P-gp inhibitor  | CYP3A4/P-gp inhibitor  | CYP3A4/P-gp inhibitor  | CYP3A4/P-gp inhibitor  |
| benzylamine          | Pharmacodynamic effect | Pharmacodynamic effect | Pharmacodynamic effect | Pharmacodynamic effect |
| bicalutamide         | CYP3A4/P-gp inhibitor  | NA                     | NA                     | CYP3A4/P-gp inhibitor  |
| bivalirudin          | Pharmacodynamic effect | Pharmacodynamic effect | Pharmacodynamic effect | Pharmacodynamic effect |
| boceprevir           | CYP3A4/P-gp inhibitor  | CYP3A4/P-gp inhibitor  | CYP3A4/P-gp inhibitor  | CYP3A4/P-gp inhibitor  |
| caplacizumab         | Pharmacodynamic effect | Pharmacodynamic effect | Pharmacodynamic effect | Pharmacodynamic effect |
| carbamazepine        | CYP3A4/P-gp inducer    | CYP3A4/P-gp inducer    | NA                     | CYP3A4/P-gp inducer    |
| cariprazine          | NA                     | CYP3A4/P-gp inhibitor  | CYP3A4/P-gp inhibitor  | NA                     |
| celecoxib            | Pharmacodynamic effect | Pharmacodynamic effect | Pharmacodynamic effect | Pharmacodynamic effect |
| ciclosporin          | CYP3A4/P-gp inhibitor  | CYP3A4/P-gp inhibitor  | CYP3A4/P-gp inhibitor  | CYP3A4/P-gp inhibitor  |
| cilostazol           | Pharmacodynamic effect | Pharmacodynamic effect | Pharmacodynamic effect | Pharmacodynamic effect |
| citalopram           | Pharmacodynamic effect | Pharmacodynamic effect | Pharmacodynamic effect | Pharmacodynamic effect |
| clarithromycin       | CYP3A4/P-gp inhibitor  | CYP3A4/P-gp inhibitor  | CYP3A4/P-gp inhibitor  | CYP3A4/P-gp inhibitor  |
| clomipramine         | Pharmacodynamic effect | Pharmacodynamic effect | Pharmacodynamic effect | Pharmacodynamic effect |
| clopidogrel          | Pharmacodynamic effect | Pharmacodynamic effect | Pharmacodynamic effect | Pharmacodynamic effect |
| cobicistat           | CYP3A4/P-gp inhibitor  | CYP3A4/P-gp inhibitor  | CYP3A4/P-gp inhibitor  | CYP3A4/P-gp inhibitor  |
| crizotinib           | CYP3A4/P-gp inhibitor  | CYP3A4/P-gp inhibitor  | CYP3A4/P-gp inhibitor  | CYP3A4/P-gp inhibitor  |
| dabigatran           | Pharmacodynamic effect | NA                     | Pharmacodynamic effect | Pharmacodynamic effect |
| dalteparin           | Pharmacodynamic effect | Pharmacodynamic effect | Pharmacodynamic effect | Pharmacodynamic effect |
| danaparoid           | Pharmacodynamic effect | Pharmacodynamic effect | Pharmacodynamic effect | Pharmacodynamic effect |
| darunavir            | CYP3A4/P-gp inhibitor  | CYP3A4/P-gp inhibitor  | CYP3A4/P-gp inhibitor  | CYP3A4/P-gp inhibitor  |
| defibrotide          | Pharmacodynamic effect | Pharmacodynamic effect | Pharmacodynamic effect | Pharmacodynamic effect |
| desirudin            | Pharmacodynamic effect | Pharmacodynamic effect | Pharmacodynamic effect | Pharmacodynamic effect |
| dexamethasone        | CYP3A4/P-gp inducer    | CYP3A4/P-gp inducer    | CYP3A4/P-gp inducer    | CYP3A4/P-gp inducer    |
| dexibuprofen         | Pharmacodynamic effect | Pharmacodynamic effect | Pharmacodynamic effect | Pharmacodynamic effect |
| dexketoprofen        | Pharmacodynamic effect | Pharmacodynamic effect | Pharmacodynamic effect | Pharmacodynamic effect |
| diclofenac           | Pharmacodynamic effect | Pharmacodynamic effect | Pharmacodynamic effect | Pharmacodynamic effect |
| diflunisal           | Pharmacodynamic effect | Pharmacodynamic effect | Pharmacodynamic effect | Pharmacodynamic effect |
| diltiazem            | CYP3A4/P-gp inhibitor  | CYP3A4/P-gp inhibitor  | CYP3A4/P-gp inhibitor  | CYP3A4/P-gp inhibitor  |
| dipyridamole         | Pharmacodynamic effect | Pharmacodynamic effect | Pharmacodynamic effect | Pharmacodynamic effect |

|                       |                        |                        |                        |                        |
|-----------------------|------------------------|------------------------|------------------------|------------------------|
| doxorubicin           | CYP3A4/P-gp inducer    | CYP3A4/P-gp inducer    | CYP3A4/P-gp inducer    | CYP3A4/P-gp inducer    |
| dronedarone           | CYP3A4/P-gp inhibitor  | CYP3A4/P-gp inhibitor  | CYP3A4/P-gp inhibitor  | CYP3A4/P-gp inhibitor  |
| duloxetine            | Pharmacodynamic effect | Pharmacodynamic effect | Pharmacodynamic effect | Pharmacodynamic effect |
| edoxaban              | Pharmacodynamic effect | Pharmacodynamic effect | NA                     | Pharmacodynamic effect |
| efavirenz             | CYP3A4/P-gp inducer    | NA                     | NA                     | CYP3A4/P-gp inducer    |
| enoxaparin            | Pharmacodynamic effect | Pharmacodynamic effect | Pharmacodynamic effect | Pharmacodynamic effect |
| enzalutamide          | CYP3A4/P-gp inducer    | CYP3A4/P-gp inducer    | CYP3A4/P-gp inducer    | CYP3A4/P-gp inducer    |
| epoprostenol          | Pharmacodynamic effect | Pharmacodynamic effect | Pharmacodynamic effect | Pharmacodynamic effect |
| erythromycin          | CYP3A4/P-gp inhibitor  | CYP3A4/P-gp inhibitor  | CYP3A4/P-gp inhibitor  | CYP3A4/P-gp inhibitor  |
| escitalopram          | Pharmacodynamic effect | Pharmacodynamic effect | Pharmacodynamic effect | Pharmacodynamic effect |
| etodolac              | Pharmacodynamic effect | Pharmacodynamic effect | Pharmacodynamic effect | Pharmacodynamic effect |
| etoricoxib            | Pharmacodynamic effect | Pharmacodynamic effect | Pharmacodynamic effect | Pharmacodynamic effect |
| fluconazole           | CYP3A4/P-gp inhibitor  | NA                     | NA                     | CYP3A4/P-gp inhibitor  |
| fluoxetine            | Pharmacodynamic effect | Pharmacodynamic effect | Pharmacodynamic effect | Pharmacodynamic effect |
| flurbiprofen          | Pharmacodynamic effect | Pharmacodynamic effect | Pharmacodynamic effect | Pharmacodynamic effect |
| fluvoxamine           | Pharmacodynamic effect | Pharmacodynamic effect | Pharmacodynamic effect | Pharmacodynamic effect |
| fondaparinux          | Pharmacodynamic effect | Pharmacodynamic effect | Pharmacodynamic effect | Pharmacodynamic effect |
| fosamprenavir         | CYP3A4/P-gp inhibitor  | CYP3A4/P-gp inhibitor  | CYP3A4/P-gp inhibitor  | CYP3A4/P-gp inhibitor  |
| glecaprevir           | NA                     | CYP3A4/P-gp inhibitor  | NA                     | NA                     |
| heparin               | Pharmacodynamic effect | Pharmacodynamic effect | Pharmacodynamic effect | Pharmacodynamic effect |
| ibrutinib             | Pharmacodynamic effect | Pharmacodynamic effect | Pharmacodynamic effect | Pharmacodynamic effect |
| ibuprofen             | Pharmacodynamic effect | Pharmacodynamic effect | Pharmacodynamic effect | Pharmacodynamic effect |
| idelalisib            | CYP3A4/P-gp inhibitor  | NA                     | NA                     | CYP3A4/P-gp inhibitor  |
| iloprost              | Pharmacodynamic effect | Pharmacodynamic effect | Pharmacodynamic effect | Pharmacodynamic effect |
| imatinib              | CYP3A4/P-gp inhibitor  | CYP3A4/P-gp inhibitor  | CYP3A4/P-gp inhibitor  | CYP3A4/P-gp inhibitor  |
| indinavir             | CYP3A4/P-gp inhibitor  | CYP3A4/P-gp inhibitor  | CYP3A4/P-gp inhibitor  | CYP3A4/P-gp inhibitor  |
| indobufen             | Pharmacodynamic effect | Pharmacodynamic effect | Pharmacodynamic effect | Pharmacodynamic effect |
| indometacin           | Pharmacodynamic effect | Pharmacodynamic effect | Pharmacodynamic effect | Pharmacodynamic effect |
| inotuzumab ozogamicin | Pharmacodynamic effect | Pharmacodynamic effect | Pharmacodynamic effect | Pharmacodynamic effect |
| ipilimumab            | Pharmacodynamic effect | Pharmacodynamic effect | Pharmacodynamic effect | Pharmacodynamic effect |
| itraconazole          | CYP3A4/P-gp inhibitor  | CYP3A4/P-gp inhibitor  | CYP3A4/P-gp inhibitor  | CYP3A4/P-gp inhibitor  |
| kebutzone             | Pharmacodynamic effect | Pharmacodynamic effect | Pharmacodynamic effect | Pharmacodynamic effect |
| ketoconazole          | CYP3A4/P-gp inhibitor  | CYP3A4/P-gp inhibitor  | CYP3A4/P-gp inhibitor  | CYP3A4/P-gp inhibitor  |
| ketoprofen            | Pharmacodynamic effect | Pharmacodynamic effect | Pharmacodynamic effect | Pharmacodynamic effect |
| ketorolac             | Pharmacodynamic effect | Pharmacodynamic effect | Pharmacodynamic effect | Pharmacodynamic effect |
| lapatinib             | CYP3A4/P-gp inhibitor  | CYP3A4/P-gp inhibitor  | CYP3A4/P-gp inhibitor  | CYP3A4/P-gp inhibitor  |
| lepirudin             | Pharmacodynamic effect | Pharmacodynamic effect | Pharmacodynamic effect | Pharmacodynamic effect |
| letermovir            | NA                     | CYP3A4/P-gp inducer    | NA                     | NA                     |
| levetiracetam         | CYP3A4/P-gp inducer    | CYP3A4/P-gp inducer    | CYP3A4/P-gp inducer    | CYP3A4/P-gp inducer    |
| lopinavir             | CYP3A4/P-gp inhibitor  | CYP3A4/P-gp inhibitor  | CYP3A4/P-gp inhibitor  | CYP3A4/P-gp inhibitor  |
| lornoxicam            | Pharmacodynamic effect | Pharmacodynamic effect | Pharmacodynamic effect | Pharmacodynamic effect |
| lumacaftor            | CYP3A4/P-gp inducer    | NA                     | NA                     | CYP3A4/P-gp inducer    |
| lumiracoxib           | Pharmacodynamic effect | Pharmacodynamic effect | Pharmacodynamic effect | Pharmacodynamic effect |
| meclofenamic acid     | Pharmacodynamic effect | Pharmacodynamic effect | Pharmacodynamic effect | Pharmacodynamic effect |
| mefenamic acid        | Pharmacodynamic effect | Pharmacodynamic effect | Pharmacodynamic effect | Pharmacodynamic effect |



|                      |                        |                        |                        |                        |
|----------------------|------------------------|------------------------|------------------------|------------------------|
| meloxicam            | Pharmacodynamic effect | Pharmacodynamic effect | Pharmacodynamic effect | Pharmacodynamic effect |
| miconazole           | CYP3A4/P-gp inhibitor  | NA                     | NA                     | CYP3A4/P-gp inhibitor  |
| milnacipran          | Pharmacodynamic effect | Pharmacodynamic effect | Pharmacodynamic effect | Pharmacodynamic effect |
| mitotane             | CYP3A4/P-gp inducer    | NA                     | NA                     | CYP3A4/P-gp inducer    |
| nabumetone           | Pharmacodynamic effect | Pharmacodynamic effect | Pharmacodynamic effect | Pharmacodynamic effect |
| nadroparin           | Pharmacodynamic effect | Pharmacodynamic effect | Pharmacodynamic effect | Pharmacodynamic effect |
| naproxen             | Pharmacodynamic effect | Pharmacodynamic effect | Pharmacodynamic effect | Pharmacodynamic effect |
| nelfinavir           | CYP3A4/P-gp inhibitor  | CYP3A4/P-gp inhibitor  | CYP3A4/P-gp inhibitor  | CYP3A4/P-gp inhibitor  |
| neratinib            | NA                     | CYP3A4/P-gp inhibitor  | CYP3A4/P-gp inhibitor  | NA                     |
| niflumic acid        | Pharmacodynamic effect | Pharmacodynamic effect | Pharmacodynamic effect | Pharmacodynamic effect |
| nilotinib            | CYP3A4/P-gp inhibitor  | CYP3A4/P-gp inhibitor  | CYP3A4/P-gp inhibitor  | CYP3A4/P-gp inhibitor  |
| nimesulide           | Pharmacodynamic effect | Pharmacodynamic effect | Pharmacodynamic effect | Pharmacodynamic effect |
| oxcarbazepine        | CYP3A4/P-gp inducer    | NA                     | NA                     | CYP3A4/P-gp inducer    |
| paclitaxel           | CYP3A4/P-gp inducer    | NA                     | NA                     | CYP3A4/P-gp inducer    |
| parecoxib            | Pharmacodynamic effect | Pharmacodynamic effect | Pharmacodynamic effect | Pharmacodynamic effect |
| paroxetine           | Pharmacodynamic effect | Pharmacodynamic effect | Pharmacodynamic effect | Pharmacodynamic effect |
| pentosan polysulfate | Pharmacodynamic effect | Pharmacodynamic effect | Pharmacodynamic effect | Pharmacodynamic effect |
| phenobarbital        | CYP3A4/P-gp inducer    | CYP3A4/P-gp inducer    | CYP3A4/P-gp inducer    | CYP3A4/P-gp inducer    |
| phenprocoumon        | Pharmacodynamic effect | Pharmacodynamic effect | Pharmacodynamic effect | Pharmacodynamic effect |
| phenylbutazone       | Pharmacodynamic effect | Pharmacodynamic effect | Pharmacodynamic effect | Pharmacodynamic effect |
| phenytoin            | CYP3A4/P-gp inducer    | CYP3A4/P-gp inducer    | CYP3A4/P-gp inducer    | CYP3A4/P-gp inducer    |
| pibrentasvir         | NA                     | CYP3A4/P-gp inhibitor  | NA                     | NA                     |
| piroxicam            | Pharmacodynamic effect | Pharmacodynamic effect | Pharmacodynamic effect | Pharmacodynamic effect |
| posaconazole         | CYP3A4/P-gp inhibitor  | CYP3A4/P-gp inhibitor  | CYP3A4/P-gp inhibitor  | CYP3A4/P-gp inhibitor  |
| prasugrel            | Pharmacodynamic effect | Pharmacodynamic effect | Pharmacodynamic effect | Pharmacodynamic effect |
| prednisone           | CYP3A4/P-gp inducer    | NA                     | NA                     | CYP3A4/P-gp inducer    |
| primidone            | CYP3A4/P-gp inducer    | NA                     | NA                     | CYP3A4/P-gp inducer    |
| proglumetacin        | Pharmacodynamic effect | Pharmacodynamic effect | Pharmacodynamic effect | Pharmacodynamic effect |
| propafenone          | CYP3A4/P-gp inhibitor  | CYP3A4/P-gp inhibitor  | CYP3A4/P-gp inhibitor  | CYP3A4/P-gp inhibitor  |
| quinidine            | CYP3A4/P-gp inhibitor  | CYP3A4/P-gp inhibitor  | CYP3A4/P-gp inhibitor  | CYP3A4/P-gp inhibitor  |
| ramucirumab          | Pharmacodynamic effect | Pharmacodynamic effect | Pharmacodynamic effect | Pharmacodynamic effect |
| reviparin            | Pharmacodynamic effect | Pharmacodynamic effect | Pharmacodynamic effect | Pharmacodynamic effect |
| rifampicin           | CYP3A4/P-gp inducer    | CYP3A4/P-gp inducer    | NA                     | CYP3A4/P-gp inducer    |
| rifamycin            | CYP3A4/P-gp inducer    | CYP3A4/P-gp inducer    | NA                     | CYP3A4/P-gp inducer    |
| ritonavir            | CYP3A4/P-gp inhibitor  | CYP3A4/P-gp inhibitor  | CYP3A4/P-gp inhibitor  | CYP3A4/P-gp inhibitor  |
| rivaroxaban          | Pharmacodynamic effect | Pharmacodynamic effect | Pharmacodynamic effect | NA                     |
| rofecoxib            | Pharmacodynamic effect | Pharmacodynamic effect | Pharmacodynamic effect | Pharmacodynamic effect |
| rolapitant           | NA                     | CYP3A4/P-gp inhibitor  | CYP3A4/P-gp inhibitor  | NA                     |
| saquinavir           | CYP3A4/P-gp inhibitor  | CYP3A4/P-gp inhibitor  | CYP3A4/P-gp inhibitor  | CYP3A4/P-gp inhibitor  |
| sarilumab            | CYP3A4/P-gp inducer    | NA                     | NA                     | CYP3A4/P-gp inducer    |
| sertraline           | Pharmacodynamic effect | Pharmacodynamic effect | Pharmacodynamic effect | Pharmacodynamic effect |
| siltuximab           | CYP3A4/P-gp inducer    | NA                     | CYP3A4/P-gp inducer    | CYP3A4/P-gp inducer    |
| sulindac             | Pharmacodynamic effect | Pharmacodynamic effect | Pharmacodynamic effect | Pharmacodynamic effect |
| sunitinib            | CYP3A4/P-gp inducer    | CYP3A4/P-gp inducer    | CYP3A4/P-gp inducer    | CYP3A4/P-gp inducer    |
| tacrolimus           | CYP3A4/P-gp inhibitor  | CYP3A4/P-gp inhibitor  | CYP3A4/P-gp inhibitor  | CYP3A4/P-gp inhibitor  |

|                  |                        |                        |                        |                        |
|------------------|------------------------|------------------------|------------------------|------------------------|
| tamoxifen        | CYP3A4/P-gp inhibitor  | CYP3A4/P-gp inhibitor  | CYP3A4/P-gp inhibitor  | CYP3A4/P-gp inhibitor  |
| telaprevir       | CYP3A4/P-gp inhibitor  | CYP3A4/P-gp inhibitor  | CYP3A4/P-gp inhibitor  | CYP3A4/P-gp inhibitor  |
| telithromycin    | CYP3A4/P-gp inhibitor  | CYP3A4/P-gp inhibitor  | CYP3A4/P-gp inhibitor  | CYP3A4/P-gp inhibitor  |
| tenoxicam        | Pharmacodynamic effect | Pharmacodynamic effect | Pharmacodynamic effect | Pharmacodynamic effect |
| tiaprofenic acid | Pharmacodynamic effect | Pharmacodynamic effect | Pharmacodynamic effect | Pharmacodynamic effect |
| ticagrelor       | Pharmacodynamic effect | Pharmacodynamic effect | Pharmacodynamic effect | Pharmacodynamic effect |
| ticlopidine      | Pharmacodynamic effect | Pharmacodynamic effect | Pharmacodynamic effect | Pharmacodynamic effect |
| tinzaparin       | Pharmacodynamic effect | Pharmacodynamic effect | Pharmacodynamic effect | Pharmacodynamic effect |
| tipranavir       | CYP3A4/P-gp inhibitor  | CYP3A4/P-gp inhibitor  | CYP3A4/P-gp inhibitor  | CYP3A4/P-gp inhibitor  |
| tocilizumab      | CYP3A4/P-gp inducer    | NA                     | NA                     | CYP3A4/P-gp inducer    |
| tolfenamic acid  | Pharmacodynamic effect | Pharmacodynamic effect | Pharmacodynamic effect | Pharmacodynamic effect |
| topiramate       | CYP3A4/P-gp inducer    | NA                     | NA                     | CYP3A4/P-gp inducer    |
| tramadol         | Pharmacodynamic effect | Pharmacodynamic effect | Pharmacodynamic effect | Pharmacodynamic effect |
| treprostinil     | Pharmacodynamic effect | Pharmacodynamic effect | Pharmacodynamic effect | Pharmacodynamic effect |
| troleandomycin   | CYP3A4/P-gp inhibitor  | NA                     | NA                     | CYP3A4/P-gp inhibitor  |
| valdecoxib       | Pharmacodynamic effect | Pharmacodynamic effect | Pharmacodynamic effect | Pharmacodynamic effect |
| valproic acid    | CYP3A4/P-gp inducer    | CYP3A4/P-gp inducer    | CYP3A4/P-gp inducer    | CYP3A4/P-gp inducer    |
| vandetanib       | CYP3A4/P-gp inducer    | CYP3A4/P-gp inducer    | CYP3A4/P-gp inducer    | CYP3A4/P-gp inducer    |
| warfarin         | Pharmacodynamic effect | Pharmacodynamic effect | Pharmacodynamic effect | Pharmacodynamic effect |
| velpatasvir      | NA                     | CYP3A4/P-gp inhibitor  | NA                     | NA                     |
| venetoclax       | NA                     | CYP3A4/P-gp inhibitor  | NA                     | NA                     |
| venlafaxine      | Pharmacodynamic effect | Pharmacodynamic effect | Pharmacodynamic effect | Pharmacodynamic effect |
| verapamil        | CYP3A4/P-gp inhibitor  | CYP3A4/P-gp inhibitor  | CYP3A4/P-gp inhibitor  | CYP3A4/P-gp inhibitor  |
| vinblastine      | CYP3A4/P-gp inducer    | CYP3A4/P-gp inducer    | CYP3A4/P-gp inducer    | CYP3A4/P-gp inducer    |
| vorapaxar        | Pharmacodynamic effect | Pharmacodynamic effect | Pharmacodynamic effect | Pharmacodynamic effect |
| voriconazole     | CYP3A4/P-gp inhibitor  | CYP3A4/P-gp inhibitor  | CYP3A4/P-gp inhibitor  | CYP3A4/P-gp inhibitor  |
| voxilaprevir     | NA                     | CYP3A4/P-gp inhibitor  | NA                     | NA                     |

**Supplementary table 4.** Potential NOAC-drug interactions at index, in 244,597 patients with newly initiated NOAC treatment during 2008 – 2017 in Swedish outpatient care. Values are given as n (%).

|                                | <b>Apixaban<br/>n = 148108</b> | <b>Rivaroxaban<br/>n = 59276</b> | <b>Dabigatran<br/>n = 35617</b> | <b>Edoxaban<br/>n = 1596</b> |
|--------------------------------|--------------------------------|----------------------------------|---------------------------------|------------------------------|
| <b>Cardiovascular drugs</b>    |                                |                                  |                                 |                              |
| Amiodarone                     | 1368 (0.92)                    | 341 (0.58)                       | 207 (0.58)                      | 38 (2.38)                    |
| Diltiazem                      | 528 (0.36)                     | 259 (0.44)                       | 195 (0.55)                      | 9 (0.56)                     |
| Dronedarone                    | 1135 (0.77)                    | 168 (0.28)                       | 201 (0.56)                      | 129 (8.08)                   |
| Propafenone                    | 19 (0.01)                      | 10 (0.02)                        | 20 (0.06)                       | 0 (0)                        |
| Verapamil                      | 962 (0.65)                     | 416 (0.7)                        | 250 (0.7)                       | 16 (1)                       |
| <b>Antiepileptics</b>          |                                |                                  |                                 |                              |
| Carbamazepine                  | 525 (0.35)                     | 159 (0.27)                       | 113 (0.32)                      | 19 (1.19)                    |
| Levetiracetam                  | 651 (0.44)                     | 248 (0.42)                       | 157 (0.44)                      | 8 (0.5)                      |
| Oxcarbazepine                  | 29 (0.02)                      | 13 (0.02)                        | 8 (0.02)                        | 0 (0)                        |
| Phenobarbital                  | 48 (0.03)                      | 18 (0.03)                        | 12 (0.03)                       | 1 (0.06)                     |
| Phenytoin                      | 118 (0.08)                     | 47 (0.08)                        | 26 (0.07)                       | 4 (0.25)                     |
| Primidone                      | 0 (0)                          | 1 (<0.01)                        | 3 (<0.01)                       | 0 (0)                        |
| Topiramate                     | 40 (0.03)                      | 22 (0.04)                        | 8 (0.02)                        | 0 (0)                        |
| Valproic acid                  | 365 (0.25)                     | 137 (0.23)                       | 61 (0.17)                       | 3 (0.19)                     |
| <b>Antibiotics</b>             |                                |                                  |                                 |                              |
| Clarithromycin                 | 53 (0.04)                      | 19 (0.03)                        | 7 (0.02)                        | 1 (0.06)                     |
| Erythromycin                   | 20 (0.01)                      | 12 (0.02)                        | 3 (<0.01)                       | 0 (0)                        |
| Rifampicin                     | 56 (0.04)                      | 24 (0.04)                        | 12 (0.03)                       | 5 (0.31)                     |
| <b>Antidepressants</b>         |                                |                                  |                                 |                              |
| Citalopram                     | 5401 (3.65)                    | 1930 (3.26)                      | 1095 (3.07)                     | 53 (3.32)                    |
| Escitalopram                   | 1523 (1.03)                    | 597 (1.01)                       | 282 (0.79)                      | 17 (1.07)                    |
| Fluoxetine                     | 438 (0.3)                      | 208 (0.35)                       | 115 (0.32)                      | 3 (0.19)                     |
| Fluvoxamine                    | 2 (<0.01)                      | 2 (<0.01)                        | 0 (0)                           | 0 (0)                        |
| Paroxetine                     | 473 (0.32)                     | 208 (0.35)                       | 120 (0.34)                      | 7 (0.44)                     |
| Sertraline                     | 3498 (2.36)                    | 1392 (2.35)                      | 674 (1.89)                      | 24 (1.5)                     |
| Clomipramine                   | 180 (0.12)                     | 70 (0.12)                        | 39 (0.11)                       | 5 (0.31)                     |
| Duloxetine                     | 653 (0.44)                     | 282 (0.48)                       | 172 (0.48)                      | 12 (0.75)                    |
| Venlafaxine                    | 1212 (0.82)                    | 517 (0.87)                       | 264 (0.74)                      | 19 (1.19)                    |
| <b>Antimycotics</b>            |                                |                                  |                                 |                              |
| Fluconazole                    | 159 (0.11)                     | 78 (0.13)                        | 21 (0.06)                       | 5 (0.31)                     |
| Itraconazole                   | 2 (<0.01)                      | 0 (0)                            | 4 (0.01)                        | 0 (0)                        |
| Ketoconazole                   | 0 (0)                          | 1 (<0.01)                        | 0 (0)                           | 0 (0)                        |
| Posaconazole                   | 3 (<0.01)                      | 1 (<0.01)                        | 2 (<0.01)                       | 0 (0)                        |
| Voriconazole                   | 1 (<0.01)                      | 1 (<0.01)                        | 1 (<0.01)                       | 0 (0)                        |
| <b>Antineoplastic agents</b>   |                                |                                  |                                 |                              |
| Enzalutamide                   | 50 (0.03)                      | 7 (0.01)                         | 10 (0.03)                       | 3 (0.19)                     |
| Abiraterone                    | 22 (0.01)                      | 8 (0.01)                         | 2 (<0.01)                       | 1 (0.06)                     |
| Bicalutamide                   | 1033 (0.7)                     | 352 (0.59)                       | 150 (0.42)                      | 13 (0.81)                    |
| Tamoxifen                      | 390 (0.26)                     | 192 (0.32)                       | 87 (0.24)                       | 11 (0.69)                    |
| <b>Immunomodulating agents</b> |                                |                                  |                                 |                              |

|                              |               |              |              |            |
|------------------------------|---------------|--------------|--------------|------------|
| Ciclosporin                  | 76 (0.05)     | 14 (0.02)    | 4 (0.01)     | 2 (0.13)   |
| Dexamethasone                | 205 (0.14)    | 49 (0.08)    | 5 (0.01)     | 3 (0.19)   |
| Prednisone                   | 162 (0.11)    | 90 (0.15)    | 19 (0.05)    | 2 (0.13)   |
| Tacrolimus                   | 174 (0.12)    | 42 (0.07)    | 7 (0.02)     | 5 (0.31)   |
| Tocilizumab                  | 28 (0.02)     | 7 (0.01)     | 4 (0.01)     | 0 (0)      |
| <b>Antivirals</b>            |               |              |              |            |
| Atazanavir                   | 1 (<0.01)     | 2 (<0.01)    | 0 (0)        | 0 (0)      |
| Cobicistat                   | 0 (0)         | 2 (<0.01)    | 0 (0)        | 0 (0)      |
| Darunavir                    | 0 (0)         | 1 (<0.01)    | 1 (<0.01)    | 0 (0)      |
| Efavirenz                    | 12 (<0.01)    | 5 (<0.01)    | 3 (<0.01)    | 0 (0)      |
| Glecaprevir                  | 1 (<0.01)     | 0 (0)        | 0 (0)        | 0 (0)      |
| Lopinavir                    | 0 (0)         | 1 (<0.01)    | 1 (<0.01)    | 0 (0)      |
| Pibrentasvir                 | 1 (<0.01)     | 0 (0)        | 0 (0)        | 0 (0)      |
| Ritonavir                    | 0 (0)         | 1 (<0.01)    | 1 (<0.01)    | 0 (0)      |
| Velpatasvir                  | 3 (<0.01)     | 1 (<0.01)    | 0 (0)        | 0 (0)      |
| <b>Analgesic</b>             |               |              |              |            |
| Tramadol                     | 1520 (1.03)   | 1351 (2.28)  | 2428 (6.82)  | 11 (0.69)  |
| <b>Antithrombotic agents</b> |               |              |              |            |
| Acetylsalicylic acid         | 39888 (26.93) | 14168 (23.9) | 8541 (23.98) | 375 (23.5) |
| Cilostazol                   | 11 (<0.01)    | 4 (<0.01)    | 0 (0)        | 0 (0)      |
| Clopidogrel                  | 7060 (4.77)   | 2380 (4.02)  | 1191 (3.34)  | 69 (4.32)  |
| Dipyridamole                 | 808 (0.55)    | 211 (0.36)   | 207 (0.58)   | 2 (0.13)   |
| Prasugrel                    | 20 (0.01)     | 12 (0.02)    | 9 (0.03)     | 3 (0.19)   |
| Ticagrelor                   | 1202 (0.81)   | 365 (0.62)   | 207 (0.58)   | 17 (1.07)  |
| Ticlopidine                  | 1 (<0.01)     | 0 (0)        | 1 (<0.01)    | 0 (0)      |
| Treprostinil                 | 0 (0)         | 1 (<0.01)    | 1 (<0.01)    | 0 (0)      |
| Dalteparin                   | 3495 (2.36)   | 1912 (3.23)  | 535 (1.5)    | 145 (9.09) |
| Danaparoid                   | 0 (0)         | 1 (<0.01)    | 0 (0)        | 0 (0)      |
| Enoxaparin                   | 571 (0.39)    | 236 (0.4)    | 116 (0.33)   | 16 (1)     |
| Heparin                      | 3 (<0.01)     | 2 (<0.01)    | 0 (0)        | 0 (0)      |
| Tinzaparin                   | 2488 (1.68)   | 1026 (1.73)  | 279 (0.78)   | 86 (5.39)  |
| Fondaparinux                 | 8 (<0.01)     | 7 (0.01)     | 3 (<0.01)    | 1 (0.06)   |
| <b>NSAIDs</b>                |               |              |              |            |
| Celecoxib                    | 1105 (0.75)   | 154 (0.26)   | 134 (0.38)   | 6 (0.38)   |
| Dexibuprofen                 | 120 (0.08)    | 80 (0.13)    | 63 (0.18)    | 1 (0.06)   |
| Diclofenac                   | 2038 (1.38)   | 1622 (2.74)  | 1818 (5.1)   | 7 (0.44)   |
| Etoricoxib                   | 4207 (2.84)   | 2845 (4.8)   | 782 (2.2)    | 6 (0.38)   |
| Ibuprofen                    | 1256 (0.85)   | 666 (1.12)   | 559 (1.57)   | 9 (0.56)   |
| Indometacin                  | 1 (<0.01)     | 3 (<0.01)    | 8 (0.02)     | 0 (0)      |
| Ketoprofen                   | 781 (0.53)    | 424 (0.72)   | 420 (1.18)   | 4 (0.25)   |
| Lornoxicam                   | 1 (<0.01)     | 0 (0)        | 0 (0)        | 0 (0)      |
| Meloxicam                    | 59 (0.04)     | 29 (0.05)    | 30 (0.08)    | 0 (0)      |
| Nabumetone                   | 242 (0.16)    | 87 (0.15)    | 308 (0.86)   | 1 (0.06)   |
| Naproxen                     | 3604 (2.43)   | 1990 (3.36)  | 1098 (3.08)  | 19 (1.19)  |
| Piroxicam                    | 13 (<0.01)    | 6 (0.01)     | 14 (0.04)    | 0 (0)      |

|           |           |           |           |       |
|-----------|-----------|-----------|-----------|-------|
| Tenoxicam | 53 (0.04) | 30 (0.05) | 26 (0.07) | 0 (0) |
|-----------|-----------|-----------|-----------|-------|

Percentages based on the total number of patients dispensed each NOAC.

**Supplementary table 5.** Number of patients and events during the first 6 months of newly initiated NOAC treatment in 244 597 patients during 2008 – 2017 in Swedish outpatient care.

| NOAC                          | Interacting group            |                                        |                                            | All                  | Not interacting group | Interacting group |             |
|-------------------------------|------------------------------|----------------------------------------|--------------------------------------------|----------------------|-----------------------|-------------------|-------------|
| Apixaban                      | Pharmacodynamic effect       | Any severe bleed                       | n                                          | 156280               | 84871                 | 71409             |             |
|                               |                              |                                        | Any severe bleed (%)                       | 1616 (1.034)         | 890 (1.049)           | 726 (1.017)       |             |
|                               |                              | Gastrointestinal bleeding              | n                                          | 156280               | 84871                 | 71409             |             |
|                               |                              |                                        | Gastrointestinal bleeding (%)              | 617 (0.395)          | 333 (0.392)           | 284 (0.398)       |             |
|                               |                              | Intracranial bleeding                  | n                                          | 156280               | 84871                 | 71409             |             |
|                               |                              |                                        | Intracranial bleeding (%)                  | 276 (0.177)          | 159 (0.187)           | 117 (0.164)       |             |
|                               | CYP3A4 and/or P-gp inducer   | Ischemic stroke/stroke unspecified/TIA | n                                          | 156280               | 153992                | 2288              |             |
|                               |                              |                                        | Ischemic stroke/stroke unspecified/TIA (%) | 2576 (1.648)         | 2535 (1.646)          | 41 (1.792)        |             |
|                               |                              | Ischemic stroke                        | n                                          | 156280               | 153992                | 2288              |             |
|                               |                              |                                        | Ischemic stroke (%)                        | 1767 (1.131)         | 1732 (1.125)          | 35 (1.53)         |             |
|                               |                              | Venous thrombosis                      | n                                          | 156280               | 153992                | 2288              |             |
|                               |                              |                                        | Venous thrombosis (%)                      | 937 (0.6)            | 918 (0.596)           | 19 (0.83)         |             |
|                               | CYP3A4 and/or P-gp inhibitor | Any severe bleed                       | n                                          | 156280               | 149049                | 7231              |             |
|                               |                              |                                        | Any severe bleed (%)                       | 1930 (1.235)         | 1827 (1.226)          | 103 (1.424)       |             |
|                               |                              | Gastrointestinal bleeding              | n                                          | 156280               | 149049                | 7231              |             |
|                               |                              |                                        | Gastrointestinal bleeding (%)              | 720 (0.461)          | 676 (0.454)           | 44 (0.608)        |             |
|                               |                              | Intracranial bleeding                  | n                                          | 156280               | 149049                | 7231              |             |
|                               |                              |                                        | Intracranial bleeding (%)                  | 343 (0.219)          | 334 (0.224)           | 9 (0.124)         |             |
|                               | Dabigatran                   | Pharmacodynamic effect                 | Any severe bleed                           | n                    | 38113                 | 19672             | 18441       |
|                               |                              |                                        |                                            | Any severe bleed (%) | 472 (1.238)           | 263 (1.337)       | 209 (1.133) |
|                               |                              |                                        | Gastrointestinal bleeding                  | n                    | 38113                 | 19672             | 18441       |
| Gastrointestinal bleeding (%) |                              |                                        |                                            | 216 (0.567)          | 123 (0.625)           | 93 (0.504)        |             |
| Intracranial bleeding         |                              |                                        | n                                          | 38113                | 19672                 | 18441             |             |
|                               |                              |                                        | Intracranial bleeding (%)                  | 88 (0.231)           | 53 (0.269)            | 35 (0.19)         |             |
| CYP3A4 and/or P-gp inducer    |                              | Ischemic stroke/stroke unspecified/TIA | n                                          | 38113                | 37681                 | 432               |             |
|                               |                              |                                        | Ischemic stroke/stroke unspecified/TIA (%) | 899 (2.359)          | 880 (2.335)           | 19 (4.398)        |             |
|                               |                              | Ischemic stroke                        | n                                          | 38113                | 37681                 | 432               |             |
|                               |                              |                                        | Ischemic stroke (%)                        | 680 (1.784)          | 665 (1.765)           | 15 (3.472)        |             |
|                               |                              | Venous thrombosis                      | n                                          | 38113                | 37681                 | 432               |             |
|                               |                              |                                        | Venous thrombosis (%)                      | 139 (0.365)          | 138 (0.366)           | 1 (0.231)         |             |
| CYP3A4 and/or P-gp inhibitor  |                              | Any severe bleed                       | n                                          | 38113                | 36773                 | 1340              |             |
|                               |                              |                                        | Any severe bleed (%)                       | 536 (1.406)          | 523 (1.422)           | 13 (0.97)         |             |
|                               |                              | Gastrointestinal bleeding              | n                                          | 38113                | 36773                 | 1340              |             |
|                               |                              |                                        | Gastrointestinal bleeding (%)              | 250 (0.656)          | 243 (0.661)           | 7 (0.522)         |             |
|                               |                              | Intracranial bleeding                  | n                                          | 38113                | 36773                 | 1340              |             |
|                               |                              |                                        | Intracranial bleeding (%)                  | 95 (0.249)           | 94 (0.256)            | 1 (0.075)         |             |
| Edoxaban                      |                              | Pharmacodynamic effect                 | Any severe bleed                           | n                    | 2486                  | 968               | 1518        |
|                               |                              |                                        |                                            | Any severe bleed (%) | 8 (0.322)             | 0 (0)             | 8 (0.527)   |
|                               |                              |                                        | Gastrointestinal bleeding                  | n                    | 2486                  | 968               | 1518        |

|                           |                              |                                        |                                            |              |              |             |
|---------------------------|------------------------------|----------------------------------------|--------------------------------------------|--------------|--------------|-------------|
|                           |                              |                                        | Gastrointestinal bleeding (%)              | 3 (0.121)    | 0 (0)        | 3 (0.198)   |
|                           |                              | Intracranial bleeding                  | n                                          | 2486         | 968          | 1518        |
|                           |                              | Intracranial bleeding (%)              |                                            | 0 (0)        | 0 (0)        | 0 (0)       |
|                           | CYP3A4 and/or P-gp inducer   | Ischemic stroke/stroke unspecified/TIA | n                                          | 2486         | 2459         | 27          |
|                           |                              |                                        | Ischemic stroke/stroke unspecified/TIA (%) | 2 (0.08)     | 2 (0.081)    | 0 (0)       |
|                           |                              | Ischemic stroke                        | n                                          | 2486         | 2459         | 27          |
|                           |                              |                                        | Ischemic stroke (%)                        | 1 (0.04)     | 1 (0.041)    | 0 (0)       |
|                           |                              | Venous thrombosis                      | n                                          | 2486         | 2459         | 27          |
|                           |                              |                                        | Venous thrombosis (%)                      | 4 (0.161)    | 2 (0.081)    | 2 (7.407)   |
|                           | CYP3A4 and/or P-gp inhibitor | Any severe bleed                       | n                                          | 2486         | 1865         | 621         |
|                           |                              |                                        | Any severe bleed (%)                       | 10 (0.402)   | 8 (0.429)    | 2 (0.322)   |
|                           |                              | Gastrointestinal bleeding              | n                                          | 2486         | 1865         | 621         |
|                           |                              |                                        | Gastrointestinal bleeding (%)              | 3 (0.121)    | 2 (0.107)    | 1 (0.161)   |
|                           |                              | Intracranial bleeding                  | n                                          | 2486         | 1865         | 621         |
| Intracranial bleeding (%) |                              |                                        | 0 (0)                                      | 0 (0)        | 0 (0)        |             |
| Rivaroxaban               | Pharmacodynamic effect       | Any severe bleed                       | n                                          | 62811        | 32650        | 30161       |
|                           |                              |                                        | Any severe bleed (%)                       | 1047 (1.667) | 528 (1.617)  | 519 (1.721) |
|                           |                              | Gastrointestinal bleeding              | n                                          | 62811        | 32650        | 30161       |
|                           |                              |                                        | Gastrointestinal bleeding (%)              | 409 (0.651)  | 204 (0.625)  | 205 (0.68)  |
|                           |                              | Intracranial bleeding                  | n                                          | 62811        | 32650        | 30161       |
|                           |                              |                                        | Intracranial bleeding (%)                  | 139 (0.221)  | 72 (0.221)   | 67 (0.222)  |
|                           | CYP3A4 and/or P-gp inducer   | Ischemic stroke/stroke unspecified/TIA | n                                          | 62811        | 61956        | 855         |
|                           |                              |                                        | Ischemic stroke/stroke unspecified/TIA (%) | 862 (1.372)  | 844 (1.362)  | 18 (2.105)  |
|                           |                              | Ischemic stroke                        | n                                          | 62811        | 61956        | 855         |
|                           |                              |                                        | Ischemic stroke (%)                        | 580 (0.923)  | 568 (0.917)  | 12 (1.404)  |
|                           |                              | Venous thrombosis                      | n                                          | 62811        | 61956        | 855         |
|                           |                              |                                        | Venous thrombosis (%)                      | 1380 (2.197) | 1365 (2.203) | 15 (1.754)  |
|                           | CYP3A4 and/or P-gp inhibitor | Any severe bleed                       | n                                          | 62811        | 60684        | 2127        |
|                           |                              |                                        | Any severe bleed (%)                       | 1207 (1.922) | 1157 (1.907) | 50 (2.351)  |
|                           |                              | Gastrointestinal bleeding              | n                                          | 62811        | 60684        | 2127        |
|                           |                              |                                        | Gastrointestinal bleeding (%)              | 471 (0.75)   | 447 (0.737)  | 24 (1.128)  |
|                           |                              | Intracranial bleeding                  | n                                          | 62811        | 60684        | 2127        |
|                           |                              |                                        | Intracranial bleeding (%)                  | 163 (0.26)   | 160 (0.264)  | 3 (0.141)   |

Values are given as n (%), percentages based on the total number of patients in each group.
